# Supplementary material for: Health Care Provider Utilization of Prescription Monitoring Programs: A Systematic Review and Meta-Analysis
Source: PubMed Central journal article supplement — Pain Med. 2021 Jan 23;22(7):1570–82. doi: 10.1093/pm/pnaa412 (PMC8311582; doi:10.1093/pm/pnaa412), 2021-01-23

## APPENDICES

**Appendix A.** Search strategies for main databases used to retrieve studies to be screened for all Domains.

### MEDLINE

|   |                                                             |
|---|-------------------------------------------------------------|
| 1 | Prescription Drug Monitoring Programs/                      |
| 2 | controlled substance monitoring.tw.                         |
| 3 | (drug monitoring adj (program* or system* or network*)).tw. |
| 4 | narcotic* monitoring.tw.                                    |
| 5 | prescription drug monitoring.tw.                            |
| 6 | prescription monitoring.tw.                                 |
| 7 | prescription network*.tw.                                   |
| 8 | or/1-7                                                      |

### Embase

|   |                                                            |
|---|------------------------------------------------------------|
| 1 | 'controlled substance monitoring'                          |
| 2 | 'drug monitoring' NEAR/1 (program* OR system* OR network*) |
| 3 | 'narcotic* monitoring'                                     |
| 4 | 'prescription drug monitoring'                             |
| 5 | prescription monitoring'                                   |
| 6 | 'prescription network*'                                    |
| 7 | #1 OR #2 OR #3 OR #4 OR #5 OR #6                           |

### CINAHL & PsycINFO (identical searches)

|   |                                                      |
|---|------------------------------------------------------|
| 1 | controlled substance monitoring                      |
| 2 | drug monitoring N1 (program* or system* or network*) |
| 3 | narcotic* monitoring                                 |
| 4 | prescription drug monitoring                         |
| 5 | prescription monitoring                              |
| 6 | prescription network*                                |
| 7 | S1 OR S2 OR S3 OR S4 OR S5 OR S6                     |

## Web of Science

|   |                                                                 |
|---|-----------------------------------------------------------------|
| 1 | TS="controlled substance monitoring"                            |
| 2 | TS=("drug monitoring" NEAR/1 (program* or system* or network*)) |
| 3 | TS="narcotic* monitoring"                                       |
| 4 | TS="prescription drug monitoring"                               |
| 5 | TS="prescription monitoring"                                    |
| 6 | TS="prescription network*"                                      |
| 7 | #6 OR #5 OR #4 OR #3 OR #2 OR #1                                |

**Appendix B.** Characteristics of included studies and their reported outcomes.

| Study ID       | Years of Data | Study N | Jurisdiction, Country                                                  | Population                                           | Study Design (Data Collection Method)       | Quantitative and/or Qualitative Data | Response Rate | Data Use | Barriers |
|----------------|---------------|---------|------------------------------------------------------------------------|------------------------------------------------------|---------------------------------------------|--------------------------------------|---------------|----------|----------|
| Barrett 2005   | 2004          | 132     | Southwest Virginia, United States                                      | physicians                                           | cross-sectional (survey)                    | quantitative                         | 41%           | y        | y        |
| Blum 2016      | 2014          | 207     | New York<br>University Langone Medical Center, New York, United States | attending physicians                                 | cross-sectional (survey)                    | quantitative                         | 26%           | y        | y        |
| Chaudhary 2017 | NR            | 168     | mid-sized, private, urban university, United States                    | family nurse practitioners                           | cross-sectional (survey)                    | quantitative                         | 20%           | y        | n        |
| Coleman 2015   | 2014          | 7       | urban clinic, Mississippi, United States                               | physicians, nurse practitioners, physician assistant | retrospective chart review (medical charts) | quantitative                         | NA**          | y        | n        |

| Study ID      | Years of Data | Study N | Jurisdiction, Country                        | Population                                                        | Study Design (Data Collection Method)          | Quantitative and/or Qualitative Data | Response Rate | Data Use | Barriers |
|---------------|---------------|---------|----------------------------------------------|-------------------------------------------------------------------|------------------------------------------------|--------------------------------------|---------------|----------|----------|
| Delcher 2017  | 2011-2016     | 82836   | Florida, United States                       | physicians & dispensing pharmacists                               | cross-sectional (administrative PMP data)      | quantitative                         | NA**          | y        | n        |
| Deyo 2018     | 2011-2014     | 17734   | Oregon, United States                        | prescribers who had written at least one prescription for opioids | retrospective cohort (administrative PMP data) | quantitative                         | NA**          | y        | n        |
| Feldman 2011  | 2011          | 95      | academic medical center, Ohio, United States | physicians                                                        | cross-sectional (survey)                       | quantitative                         | 61%           | y        | y        |
| Feldman 2012  | 2011          | 95      | hospital, Ohio, United States                | resident & attending physicians                                   | cross-sectional (survey)                       | quantitative                         | 61%           | y        | y        |
| Fendrich 2018 | 2014          | 48      | Wisconsin, United States                     | pharmacists                                                       | cross-sectional (survey)                       | quantitative                         | 30%           | y        | n        |

| <b>Study ID</b>  | <b>Years of Data</b> | <b>Study N</b> | <b>Jurisdiction, Country</b>                        | <b>Population</b>                                                                 | <b>Study Design (Data Collection Method)</b>                   | <b>Quantitative and/or Qualitative Data</b> | <b>Response Rate</b> | <b>Data Use</b> | <b>Barriers</b> |
|------------------|----------------------|----------------|-----------------------------------------------------|-----------------------------------------------------------------------------------|----------------------------------------------------------------|---------------------------------------------|----------------------|-----------------|-----------------|
| Finnell 2017     | 2014-2015            | 207            | Elsevier subscribers, United States                 | medical doctors, doctors of osteopathy, nurse practitioners, physician assistants | cross-sectional (survey; pre- & post-educational intervention) | quantitative                                | NR*                  | y               | n               |
| Fleming 2013     | 2008-2009            | 15             | 15 states, United States                            | PMP administrators                                                                | cross-sectional (survey)                                       | quantitative                                | 50%                  | y               | n               |
| Fleming 2014 (1) | NR                   | 76             | emergency medicine conference, Texas, United States | ED physicians                                                                     | cross-sectional (survey)                                       | quantitative                                | 55%                  | y               | n               |
| Fleming 2014 (2) | 2012                 | 261            | Texas, United States                                | community pharmacists                                                             | cross-sectional (survey)                                       | quantitative                                | 26%                  | y               | n               |
| Gershman 2014    | 2013                 | 358            | Florida, United States                              | medical doctors & osteopathic physicians                                          | cross-sectional (survey)                                       | quantitative                                | 8%                   | y               | n               |

| Study ID                                                 | Years of Data | Study N | Jurisdiction, Country                     | Population               | Study Design (Data Collection Method) | Quantitative and/or Qualitative Data | Response Rate | Data Use | Barriers |
|----------------------------------------------------------|---------------|---------|-------------------------------------------|--------------------------|---------------------------------------|--------------------------------------|---------------|----------|----------|
| Green 2012                                               | 2011          | 1385    | Connecticut & Rhode Island, United States | prescribers              | cross-sectional (survey)              | quantitative                         | 55%           | y        | y        |
| Green 2013                                               | 2011          | 294     | Connecticut & Rhode Island, United States | pharmacists              | cross-sectional (survey)              | quantitative                         | ~10%          | y        | y        |
| Hernandez-Meier 2017                                     | 2014          | 63      | Wisconsin, United States                  | ED physicians            | cross-sectional (survey)              | quantitative                         | 16%           | y        | y        |
| Irvine 2014                                              | 2012-2013     | 1058    | Oregon, United States                     | clinicians               | cross-sectional (survey)              | quantitative                         | 36%           | y        | n        |
| Kelley 2013 ( <i>Kelly 2016 linked publication</i> )(36) | 2013          | 141     | Florida & Georgia, United States          | ED physicians            | cross-sectional (survey)              | quantitative                         | NR*           | y        | y        |
| LeMire 2012                                              | 2011          | 108     | North Dakota, United States               | advanced practice nurses | cross-sectional (survey)              | quantitative                         | 76%           | y        | y        |

| <b>Study ID</b>                                                  | <b>Years of Data</b> | <b>Study N</b> | <b>Jurisdiction, Country</b>                               | <b>Population</b>         | <b>Study Design (Data Collection Method)</b> | <b>Quantitative and/or Qualitative Data</b> | <b>Response Rate</b> | <b>Data Use</b> | <b>Barriers</b> |
|------------------------------------------------------------------|----------------------|----------------|------------------------------------------------------------|---------------------------|----------------------------------------------|---------------------------------------------|----------------------|-----------------|-----------------|
| Lin 2017                                                         | 2015                 | 405            | Maryland, United States                                    | physicians                | cross-sectional (survey)                     | quantitative                                | 44%                  | y               | y               |
| Matusow 2018                                                     | 2014-2015            | 13             | opioid treatment programs in 13 states, United States      | opioid treatment programs | cross-sectional (survey)                     | quantitative                                | 50%                  | y               | n               |
| McAllister 2015                                                  | 2014                 | 25             | urban university teaching hospital, Florida, United States | ED prescribers            | cross-sectional (survey)                     | quantitative                                | NA**                 | y               | y               |
| McCauley 2016                                                    | 2014                 | 87             | South Carolina, United States                              | dentists                  | cross-sectional (survey)                     | quantitative                                | 4%                   | y               | y               |
| Norwood 2016<br><i>(Norwood 2016 (2) linked publication)(37)</i> | 2012                 | 1000           | Indiana, United States                                     | pharmacists               | cross-sectional (survey)                     | quantitative                                | 15%                  | y               | y               |

| <b>Study ID</b> | <b>Years of Data</b> | <b>Study N</b> | <b>Jurisdiction, Country</b>                  | <b>Population</b>                                          | <b>Study Design (Data Collection Method)</b> | <b>Quantitative and/or Qualitative Data</b> | <b>Response Rate</b> | <b>Data Use</b> | <b>Barriers</b> |
|-----------------|----------------------|----------------|-----------------------------------------------|------------------------------------------------------------|----------------------------------------------|---------------------------------------------|----------------------|-----------------|-----------------|
| Penm 2018       | 2016                 | 150            | Ohio, United States                           | ED medical directors                                       | cross-sectional (survey)                     | quantitative                                | 92%                  | y               | n               |
| Piper 2016      | 2012                 | 275            | Maine, United States                          | pharmacists                                                | cross-sectional (survey)                     | quantitative                                | 22%                  | y               | n               |
| Pomerleau 2017  | 2014                 | 443            | seven academic medical centres, United States | ED providers                                               | cross-sectional (survey)                     | quantitative                                | 54%                  | y               | n               |
| Pugliese 2018   | 2016 & 2017          | 1433           | California, United States                     | pharmacists, allopathic physicians, osteopathic physicians | cross-sectional (survey)                     | quantitative                                | 24%                  | n               | y               |



| <b>Study ID</b>  | <b>Years of Data</b> | <b>Study N</b> | <b>Jurisdiction, Country</b>     | <b>Population</b>                                             | <b>Study Design (Data Collection Method)</b> | <b>Quantitative and/or Qualitative Data</b> | <b>Response Rate</b> | <b>Data Use</b> | <b>Barriers</b> |
|------------------|----------------------|----------------|----------------------------------|---------------------------------------------------------------|----------------------------------------------|---------------------------------------------|----------------------|-----------------|-----------------|
| Qureshi 2015     | 2013                 | 231            | Midwestern states, United States | high dose prescribers of patients enrolled in Blue Cross plan | cross-sectional (survey)                     | quantitative                                | 24%                  | y               | n               |
| Riley 2017       | 2016-2017            | 684            | Ohio, United States              | pharmacists                                                   | cross-sectional (survey)                     | quantitative                                | 6%                   | y               | n               |
| Ringwalt 2015    | 2009-2011            | 1600           | North Carolina, United States    | healthcare providers who queried the PMP in the study years   | retrospective cohort (North Carolina PMP)    | quantitative                                | NA**                 | y               | n               |
| Rittenhouse 2015 | 2014                 | 1541           | Arkansas, United States          | prescribers & dispensers                                      | cross-sectional (survey)                     | quantitative                                | 42%                  | y               | n               |
| Rutkow 2015      | 2014                 | 420            | all states + DC, United States   | primary care physicians                                       | cross-sectional (survey)                     | quantitative                                | 58%                  | y               | y               |

| <b>Study ID</b> | <b>Years of Data</b> | <b>Study N</b>           | <b>Jurisdiction, Country</b>       | <b>Population</b>                                                        | <b>Study Design (Data Collection Method)</b>                         | <b>Quantitative and/or Qualitative Data</b> | <b>Response Rate</b> | <b>Data Use</b> | <b>Barriers</b> |
|-----------------|----------------------|--------------------------|------------------------------------|--------------------------------------------------------------------------|----------------------------------------------------------------------|---------------------------------------------|----------------------|-----------------|-----------------|
| Sun 2018        | 2013-2014            | 17390                    | Washington, United States          | prescribers with >5 prescriptions during the study period                | retrospective cohort (administrative data from Washington state PMP) | quantitative                                | NA**                 | y               | n               |
| Ulbrich 2010    | 2008                 | 1434                     | Ohio, United States                | pharmacists                                                              | cross-sectional (survey)                                             | quantitative                                | 25%                  | n               | y               |
| Wallace 2017    | 2016                 | 3 providers; 61 patients | rural health clinic, United States | healthcare providers at clinic (physician & advanced practice providers) | cross-sectional (survey & chart review)                              | quantitative                                | 100%                 | y               | n               |

| <b>Study ID</b> | <b>Years of Data</b> | <b>Study N</b> | <b>Jurisdiction, Country</b> | <b>Population</b>                                | <b>Study Design (Data Collection Method)</b> | <b>Quantitative and/or Qualitative Data</b> | <b>Response Rate</b> | <b>Data Use</b> | <b>Barriers</b> |
|-----------------|----------------------|----------------|------------------------------|--------------------------------------------------|----------------------------------------------|---------------------------------------------|----------------------|-----------------|-----------------|
| Wang 2017       | NR                   | 47             | 21 states, United States     | academic<br>pediatric<br>emergency<br>physicians | cross-sectional<br>(survey)                  | quantitative                                | 19%                  | y               | y               |
| Wixson 2015     | 2009                 | 402            | Kentucky, United States      | pharmacists                                      | cross-sectional<br>(survey)                  | quantitative                                | 28%                  | y               | y               |
| Young 2017      | 2015-2016            | 90             | Florida, United States       | ED physicians                                    | cross-sectional<br>(survey)                  | quantitative                                | 22%                  | y               | y               |

| Study ID                                                     | Years of Data | Study N                            | Jurisdiction, Country     | Population                                                                                                   | Study Design (Data Collection Method)                                    | Quantitative and/or Qualitative Data | Response Rate                                                                                                    | Data Use | Barriers |
|--------------------------------------------------------------|---------------|------------------------------------|---------------------------|--------------------------------------------------------------------------------------------------------------|--------------------------------------------------------------------------|--------------------------------------|------------------------------------------------------------------------------------------------------------------|----------|----------|
| Deyo 2015<br><i>(Leichtling 2017 linked publication)(38)</i> | 2011-2013     | 1058<br>survey,<br>33<br>interview | Oregon, United States     | prescribers<br>(survey);<br>prescribers &<br>pharmacists<br>(administrative data); physicians<br>(interview) | cross-sectional<br>(survey &<br>administrative PMP data &<br>interviews) | quantitative &<br>qualitative        | 59%<br>(frequent users), 52%<br>(infrequent users), 25%<br>(non registrants)<br>(survey);<br>55%<br>(interviews) | y        | y        |
| Fazio 2017                                                   | NR            | 117<br>survey,<br>18<br>interview  | California, United States | physicians                                                                                                   | cross-sectional<br>(survey &<br>interview)                               | quantitative &<br>qualitative        | 7.9%<br>(survey)                                                                                                 | y        | Y        |
| Perrone 2012                                                 | 2011-2012     | 205                                | 35 states, United States  | medical toxicologists                                                                                        | cross-sectional<br>(survey)                                              | quantitative &<br>qualitative        | 46%                                                                                                              | y        | y        |

| <b>Study ID</b> | <b>Years of Data</b> | <b>Study N</b> | <b>Jurisdiction, Country</b>                                               | <b>Population</b>                                                  | <b>Study Design (Data Collection Method)</b>        | <b>Quantitative and/or Qualitative Data</b> | <b>Response Rate</b> | <b>Data Use</b> | <b>Barriers</b> |
|-----------------|----------------------|----------------|----------------------------------------------------------------------------|--------------------------------------------------------------------|-----------------------------------------------------|---------------------------------------------|----------------------|-----------------|-----------------|
| Warren 2016     | 2015                 | 8              | rural health clinics, Northwestern North Dakota, United States             | healthcare administrators and providers                            | case series (survey & interview)                    | quantitative & qualitative                  | NA**                 | y               | y               |
| Carnes 2017     | 2013                 | 1747           | Indiana, United States                                                     | primary care providers                                             | cross-sectional (survey)                            | qualitative                                 | 15%                  | n               | y               |
| Click 2017      | 2012                 | 32             | three clinics in East Tennessee & two in Southwest Virginia, United States | primary care providers, clinic directors, and clinical pharmacists | cross-sectional (focus groups)                      | qualitative                                 | NA**                 | n               | y               |
| Hildebran 2014  | 2012                 | 35             | 9 states, United States                                                    | clinicians                                                         | cross-sectional (focus group & telephone interview) | qualitative                                 | 45%                  | y               | y               |

| <b>Study ID</b> | <b>Years of Data</b> | <b>Study N</b> | <b>Jurisdiction, Country</b>                         | <b>Population</b>                              | <b>Study Design (Data Collection Method)</b> | <b>Quantitative and/or Qualitative Data</b> | <b>Response Rate</b> | <b>Data Use</b> | <b>Barriers</b> |
|-----------------|----------------------|----------------|------------------------------------------------------|------------------------------------------------|----------------------------------------------|---------------------------------------------|----------------------|-----------------|-----------------|
| Homant 2006†    | 2004                 | 11             | Michigan, United States&                             | physicians & pharmacists                       | cross-sectional (interviews)                 | qualitative                                 | NA**                 | y               | y               |
| Naiman 2013     | 2012                 | 4              | near-Chicago suburb, United States                   | ED physicians                                  | cross-sectional (focus group)                | qualitative                                 | NR*                  | n               | y               |
| Poon 2016       | 2014-2015            | 17             | large urban academic medical center, United States   | ED providers                                   | cross-sectional (semi-structured interviews) | qualitative                                 | 85%                  | y               | y               |
| Radomski 2018   | 2016                 | 42             | Massachusetts, Illinois, Pennsylvania, United States | primary care physicians with Veteran's Affairs | cross-sectional (semi-structured interviews) | qualitative                                 | 13%                  | y               | y               |

| Study ID    | Years of Data | Study N | Jurisdiction, Country                                                       | Population                                        | Study Design (Data Collection Method)        | Quantitative and/or Qualitative Data | Response Rate | Data Use | Barriers |
|-------------|---------------|---------|-----------------------------------------------------------------------------|---------------------------------------------------|----------------------------------------------|--------------------------------------|---------------|----------|----------|
| Smith 2015  | 2012          | 61      | national meeting of American College of Emergency Physicians, United States | ED physicians                                     | cross-sectional (semi-structured interviews) | qualitative                          | NA**          | n        | y        |
| Worley 2015 | NR            | 15      | United States                                                               | psychiatrists and psychiatric nurse practitioners | cross-sectional (interview)                  | qualitative                          | NA**          | n        | y        |

NOTE: Linked publications are publications that were identified by the research team as using the same study population, and therefore only one of the linked studies was included in our analyses. We identified and cited the linked publication that was not used in our analyses for reference.

**Appendix C.** Characteristics of PMP by jurisdiction, collected from PDMP Assist.

| <b>Jurisdiction</b>         | <b>Year PMP became Operational<sup>a</sup></b> | <b>State Population<sup>a</sup></b> | <b>Agency Type<sup>a</sup></b> | <b>Mandatory Enrollment<sup>b</sup></b> | <b>Mandatory Checking<sup>c</sup></b> | <b>Mandatory Training<sup>d</sup></b> | <b>Substances Tracked<sup>a</sup></b> | <b>Data Collection Frequency<sup>a</sup></b> | <b>Reports to Prescribers<sup>e</sup></b> | <b>Reports to Dispensers<sup>f</sup></b> |
|-----------------------------|------------------------------------------------|-------------------------------------|--------------------------------|-----------------------------------------|---------------------------------------|---------------------------------------|---------------------------------------|----------------------------------------------|-------------------------------------------|------------------------------------------|
| <b>Alabama</b>              | 2006                                           | 4,858,979                           | Department of Health           | Prescribers                             | Prescribers                           | None                                  | Schedules II-V & Drugs of Concern     | Daily                                        | Solicited & Unsolicited                   | Solicited & Unsolicited                  |
| <b>Alaska</b>               | 2011                                           | 738,068                             | Pharmacy Board                 | Prescribers & Dispensers                | Prescribers                           | None                                  | Schedules II-IV                       | Daily                                        | Solicited                                 | Solicited                                |
| <b>Arizona</b>              | 2008                                           | 7,123,898                           | Pharmacy Board                 | Prescribers & Dispensers                | Prescribers & Dispensers              | None                                  | Schedules II-V                        | Daily                                        | Solicited & Unsolicited                   | Solicited                                |
| <b>Arkansas</b>             | 2013                                           | 3,020,327                           | Department of Health           | Prescribers & Dispensers                | Prescribers                           | None                                  | Schedules II-V & Drugs of Concern     | Daily                                        | Solicited                                 | Solicited & Unsolicited                  |
| <b>California</b>           | 1939                                           | 39,776,830                          | Law Enforcement                | Prescribers & Dispensers                | Prescribers                           | None                                  | Schedules II-IV                       | Weekly                                       | Solicited & Unsolicited                   | Solicited                                |
| <b>Colorado</b>             | 2007                                           | 5,684,203                           | Pharmacy Board                 | Prescribers & Dispensers                | Prescribers                           | None                                  | Schedules II-V                        | Daily                                        | Solicited                                 | Solicited & Unsolicited                  |
| <b>Connecticut</b>          | 2008                                           | 3,588,683                           | Consumer Protection Agency     | Prescribers & Dispensers                | Prescribers & Dispensers              | None                                  | Schedules II-V                        | Daily                                        | Solicited & Unsolicited                   | Solicited & Unsolicited                  |
| <b>Delaware</b>             | 2012                                           | 971,180                             | Professional Licensing Agency  | Prescribers                             | Prescribers & Dispensers              | None                                  | Schedules II-V                        | Daily                                        | Solicited & Unsolicited                   | Solicited & Unsolicited                  |
| <b>District of Columbia</b> | 2016                                           | 703,608                             | Department of Health           | Not Required                            | Not Required                          | None                                  | Schedules II-V & Drugs of Concern     | Daily                                        | Solicited                                 | Solicited                                |
| <b>Florida</b>              | 2011                                           | 21,312,211                          | Department of Health           | Prescribers & Dispensers                | Prescribers & Dispensers              | Prescribers & Dispensers              | Schedules II-V                        | Daily                                        | Solicited & Unsolicited                   | Solicited                                |



| <b>Jurisdiction</b> | <b>Year PMP became Operational<sup>a</sup></b> | <b>State Population<sup>a</sup></b> | <b>Agency Type<sup>a</sup></b> | <b>Mandatory Enrollment<sup>b</sup></b> | <b>Mandatory Checking<sup>c</sup></b> | <b>Mandatory Training<sup>d</sup></b> | <b>Substances Tracked<sup>a</sup></b> | <b>Data Collection Frequency<sup>a</sup></b> | <b>Reports to Prescribers<sup>e</sup></b> | <b>Reports to Dispensers<sup>f</sup></b> |
|---------------------|------------------------------------------------|-------------------------------------|--------------------------------|-----------------------------------------|---------------------------------------|---------------------------------------|---------------------------------------|----------------------------------------------|-------------------------------------------|------------------------------------------|
| <b>Georgia</b>      | 2013                                           | 10,545,138                          | Department of Health           | Prescribers                             | Prescribers                           | None                                  | Schedules II-V                        | Daily                                        | Solicited                                 | Solicited                                |
| <b>Guam</b>         | 2013                                           | 165,374                             | Department of Health           | Dispensers                              | Prescribers                           | Prescribers & Dispensers              | Schedules II-V                        | Bi-Weekly                                    | Solicited                                 | Solicited                                |
| <b>Hawaii</b>       | 1943                                           | 1,426,393                           | Law Enforcement Agency         | Prescribers & Dispensers                | Prescribers                           | None                                  | Schedules II-V                        | Weekly                                       | Solicited & Unsolicited                   | Solicited                                |
| <b>Idaho</b>        | 1967                                           | 1,753,860                           | Pharmacy Board                 | Prescribers & Dispensers                | Not Required                          | None                                  | Schedules II-V                        | Daily                                        | Solicited & Unsolicited                   | Solicited & Unsolicited                  |
| <b>Illinois</b>     | 1968                                           | 12,768,320                          | Department of Health           | Prescribers                             | Prescribers                           | Prescribers & Dispensers              | Schedules II-V                        | Daily                                        | Solicited & Unsolicited                   | Solicited & Unsolicited                  |
| <b>Indiana</b>      | 1998                                           | 6,699,629                           | Professional Licensing Agency  | Prescribers & Dispensers                | Prescribers & Dispensers              | None                                  | Schedules II-V & Drugs of Concern     | Daily                                        | Solicited & Unsolicited                   | Solicited & Unsolicited                  |
| <b>Iowa</b>         | 2009                                           | 3,160,553                           | Pharmacy Board                 | Prescribers                             | Prescribers                           | None                                  | Schedules II-IV                       | Daily                                        | Solicited & Unsolicited                   | Solicited                                |
| <b>Kansas</b>       | 2011                                           | 2,918,515                           | Pharmacy Board                 | Not Required                            | Not Required                          | None                                  | Schedules II-IV & Drugs of Concern    | Daily                                        | Solicited & Unsolicited                   | Solicited & Unsolicited                  |
| <b>Kentucky</b>     | 1999                                           | 4,472,265                           | Department of Health           | Prescribers & Dispensers                | Prescribers                           | Prescribers & Dispensers              | Schedules II-V & Drugs of Concern     | Daily                                        | Solicited                                 | Solicited                                |
| <b>Louisiana</b>    | 2008                                           | 4,682,509                           | Pharmacy Board                 | Prescribers & Dispensers                | Prescribers                           | None                                  | Schedules II-V & Drugs of Concern     | Daily                                        | Solicited & Unsolicited                   | Solicited & Unsolicited                  |
| <b>Maine</b>        | 2004                                           | 1,341,582                           | Substance Abuse Agency         | Prescribers & Dispensers                | Prescribers & Dispensers              | None                                  | Schedules II-IV                       | Daily                                        | Solicited & Unsolicited                   | Solicited                                |

| <b>Jurisdiction</b>  | <b>Year PMP became Operational<sup>a</sup></b> | <b>State Population<sup>a</sup></b> | <b>Agency Type<sup>a</sup></b> | <b>Mandatory Enrollment<sup>b</sup></b> | <b>Mandatory Checking<sup>c</sup></b> | <b>Mandatory Training<sup>d</sup></b> | <b>Substances Tracked<sup>a</sup></b> | <b>Data Collection Frequency<sup>a</sup></b> | <b>Reports to Prescribers<sup>e</sup></b> | <b>Reports to Dispensers<sup>f</sup></b> |
|----------------------|------------------------------------------------|-------------------------------------|--------------------------------|-----------------------------------------|---------------------------------------|---------------------------------------|---------------------------------------|----------------------------------------------|-------------------------------------------|------------------------------------------|
| <b>Maryland</b>      | 2013                                           | 6,079,602                           | Substance Abuse Agency         | Prescribers & Dispensers                | Prescribers & Dispensers              | Prescribers & Dispensers              | Schedules II-V                        | Daily                                        | Solicited & Unsolicited                   | Solicited & Unsolicited                  |
| <b>Massachusetts</b> | 1994                                           | 6,895,917                           | Department of Health           | Prescribers                             | Prescribers & Dispensers              | Prescribers                           | Schedules II-V & Drugs of Concern     | Daily                                        | Solicited & Unsolicited                   | Solicited                                |
| <b>Michigan</b>      | 1989                                           | 9,991,177                           | Professional Licensing Agency  | Prescribers                             | Prescribers                           | None                                  | Schedules II-V                        | Daily                                        | Solicited & Unsolicited                   | Solicited                                |
| <b>Minnesota</b>     | 2010                                           | 5,628,162                           | Pharmacy Board                 | Prescribers & Dispensers                | Prescribers                           | None                                  | Schedules II-V & Drugs of Concern     | Daily                                        | Solicited & Unsolicited                   | Solicited & Unsolicited                  |
| <b>Mississippi</b>   | 2005                                           | 2,982,785                           | Pharmacy Board                 | Prescribers & Dispensers                | Prescribers & Dispensers              | None                                  | Schedules II-V & Drugs of Concern     | Daily                                        | Solicited                                 | Solicited                                |
| <b>Missouri*</b>     | 2017                                           | 6,135,888                           | Department of Health           | Not Required                            | Not Required                          | None                                  | Schedules II-IV                       | Daily                                        | Solicited                                 | Solicited                                |
| <b>Montana</b>       | 2012                                           | 1,062,330                           | Pharmacy Board                 | Not Required                            | Not Required                          | Prescribers & Dispensers              | Schedules II-V                        | Daily                                        | Solicited                                 | Solicited                                |
| <b>Nebraska</b>      | 2011                                           | 1,932,549                           | Department of Health           | Not Required                            | Not Required                          | Prescribers & Dispensers              | Schedules II-V & Drugs of Concern     | Daily                                        | Solicited                                 | Solicited                                |
| <b>Nevada</b>        | 1997                                           | 3,056,824                           | Pharmacy Board                 | Prescribers & Dispensers                | Prescribers                           | Prescribers & Dispensers              | Schedules II-IV                       | Daily                                        | Solicited & Unsolicited                   | Solicited & Unsolicited                  |
| <b>New Hampshire</b> | 2014                                           | 1,350,575                           | Pharmacy Board                 | Prescribers & Dispensers                | Prescribers                           | None                                  | Schedules II-IV                       | Daily                                        | Solicited & Unsolicited                   | Solicited & Unsolicited                  |
| <b>New Jersey</b>    | 2011                                           | 9,032,872                           | Law Enforcement                | Prescribers & Dispensers                | Prescribers & Dispensers              | Prescribers & Dispensers              | Schedules II-V &                      | Daily                                        | Solicited                                 | Solicited                                |

| <b>Jurisdiction</b>   | <b>Year PMP became Operational<sup>a</sup></b> | <b>State Population<sup>a</sup></b> | <b>Agency Type<sup>a</sup></b> | <b>Mandatory Enrollment<sup>b</sup></b> | <b>Mandatory Checking<sup>c</sup></b> | <b>Mandatory Training<sup>d</sup></b> | <b>Substances Tracked<sup>a</sup></b>   | <b>Data Collection Frequency<sup>a</sup></b> | <b>Reports to Prescribers<sup>e</sup></b> | <b>Reports to Dispensers<sup>f</sup></b> |
|-----------------------|------------------------------------------------|-------------------------------------|--------------------------------|-----------------------------------------|---------------------------------------|---------------------------------------|-----------------------------------------|----------------------------------------------|-------------------------------------------|------------------------------------------|
|                       |                                                |                                     |                                |                                         |                                       |                                       | Drugs of Concern                        |                                              |                                           |                                          |
| <b>New Mexico</b>     | 2005                                           | 2,090,708                           | Pharmacy Board                 | Prescribers & Dispensers                | Prescribers & Dispensers              | Prescribers & Dispensers              | Schedules II-V                          | Daily                                        | Solicited & Unsolicited                   | Solicited                                |
| <b>New York</b>       | 1973                                           | 19,862,512                          | Department of Health           | Not Required                            | Prescribers                           | None                                  | Schedules II-V & Drugs of Concern       | Daily                                        | Solicited                                 | Solicited                                |
| <b>North Carolina</b> | 2007                                           | 10,390,149                          | Substance Abuse Agency         | Prescribers & Dispensers                | Prescribers & Dispensers              | None                                  | Schedules II-V                          | Daily                                        | Solicited & Unsolicited                   | Solicited & Unsolicited                  |
| <b>North Dakota</b>   | 2007                                           | 755,238                             | Pharmacy Board                 | Prescribers & Dispensers                | Prescribers & Dispensers              | None                                  | Schedules II-V & Drugs of Concern       | Daily                                        | Solicited & Unsolicited                   | Solicited & Unsolicited                  |
| <b>Ohio</b>           | 2006                                           | 11,694,664                          | Pharmacy Board                 | Prescribers & Dispensers                | Prescribers & Dispensers              | None                                  | Schedules II-V & Drugs of Concern       | Daily                                        | Solicited                                 | Solicited                                |
| <b>Oklahoma</b>       | 1991                                           | 3,940,521                           | Law Enforcement                | Prescribers                             | Prescribers                           | None                                  | Schedules II-V                          | Daily                                        | Solicited & Unsolicited                   | Solicited & Unsolicited                  |
| <b>Oregon</b>         | 2011                                           | 4,199,563                           | Department of Health           | Prescribers & Dispensers                | Dispensers                            | None                                  | Schedules II-IV & Drugs of Concern      | 3 Days                                       | Solicited                                 | Solicited                                |
| <b>Pennsylvania</b>   | 1973                                           | 12,823,989                          | Department of Health           | Prescribers & Dispensers                | Prescribers & Dispensers              | None                                  | Schedules II-V                          | Daily                                        | Solicited                                 | Solicited                                |
| <b>Puerto Rico</b>    | 2018                                           | 3,337,177                           | Substance Abuse Agency         | Not Required                            | Not Required                          | None                                  | Schedules II-V & Other Drugs of Concern | Bi-Weekly                                    | Solicited                                 | Solicited                                |

| <b>Jurisdiction</b>   | <b>Year PMP became Operational<sup>a</sup></b> | <b>State Population<sup>a</sup></b> | <b>Agency Type<sup>a</sup></b> | <b>Mandatory Enrollment<sup>b</sup></b> | <b>Mandatory Checking<sup>c</sup></b> | <b>Mandatory Training<sup>d</sup></b> | <b>Substances Tracked<sup>a</sup></b> | <b>Data Collection Frequency<sup>a</sup></b> | <b>Reports to Prescribers<sup>e</sup></b> | <b>Reports to Dispensers<sup>f</sup></b> |
|-----------------------|------------------------------------------------|-------------------------------------|--------------------------------|-----------------------------------------|---------------------------------------|---------------------------------------|---------------------------------------|----------------------------------------------|-------------------------------------------|------------------------------------------|
| <b>Rhode Island</b>   | 1979                                           | 1,061,712                           | Department of Health           | Prescribers & Dispensers                | Prescribers                           | None                                  | Schedules II-IV                       | Daily                                        | Solicited & Unsolicited                   | Solicited & Unsolicited                  |
| <b>South Carolina</b> | 2008                                           | 5,088,916                           | Department of Health           | Not Required                            | Prescribers                           | Prescribers & Dispensers              | Schedules II-IV                       | Daily                                        | Solicited & Unsolicited                   | Solicited                                |
| <b>South Dakota</b>   | 2011                                           | 877,790                             | Pharmacy Board                 | Prescribers                             | Prescribers                           | None                                  | Schedules II-V                        | Daily                                        | Solicited & Unsolicited                   | Solicited & Unsolicited                  |
| <b>Tennessee</b>      | 2006                                           | 6,782,564                           | Pharmacy Board                 | Prescribers & Dispensers                | Prescribers & Dispensers              | None                                  | Schedules II-V                        | Daily                                        | Solicited & Unsolicited                   | Solicited                                |
| <b>Texas</b>          | 1982                                           | 28,704,330                          | Pharmacy Board                 | Prescribers & Dispensers                | Prescribers & Dispensers              | None                                  | Schedules II-V                        | Daily                                        | Solicited & Unsolicited                   | Solicited & Unsolicited                  |
| <b>Utah</b>           | 1996                                           | 3,159,345                           | Professional Licensing Agency  | Prescribers                             | Prescribers & Dispensers              | Prescribers                           | Schedules II-V & Drugs of Concern     | Daily                                        | Solicited & Unsolicited                   | Solicited & Unsolicited                  |
| <b>Vermont</b>        | 2009                                           | 623,960                             | Department of Health           | Prescribers & Dispensers                | Prescribers & Dispensers              | None                                  | Schedules II-IV                       | Daily                                        | Solicited & Unsolicited                   | Solicited                                |
| <b>Virginia</b>       | 2003                                           | 8,525,660                           | Professional Licensing Agency  | Prescribers & Dispensers                | Prescribers                           | None                                  | Schedules II-V & Drugs of Concern     | Daily                                        | Solicited & Unsolicited                   | Solicited                                |
| <b>Washington</b>     | 2011                                           | 7,530,552                           | Department of Health           | Prescribers & Dispensers                | Prescribers                           | None                                  | Schedules II-V                        | Daily                                        | Solicited                                 | Solicited                                |
| <b>West Virginia</b>  | 1995                                           | 1,803,077                           | Pharmacy Board                 | Prescribers & Dispensers                | Prescribers                           | Prescribers & Dispensers              | Schedules II-V & Drugs of Concern     | Daily                                        | Solicited & Unsolicited                   | Solicited & Unsolicited                  |
| <b>Wisconsin</b>      | 2013                                           | 5,818,049                           | Professional Licensing Agency  | Not Required                            | Prescribers                           | None                                  | Schedules II-V                        | Daily                                        | Solicited & Unsolicited                   | Solicited                                |

| <b>Jurisdiction</b> | <b>Year PMP became Operational</b><br><sub>a</sub> | <b>State Population</b><br><sub>a</sub> | <b>Agency Type</b><br><sub>a</sub> | <b>Mandatory Enrollment</b><br><sub>b</sub> | <b>Mandatory Checking</b><br><sub>c</sub> | <b>Mandatory Training</b><br><sub>d</sub> | <b>Substances Tracked</b><br><sub>a</sub> | <b>Data Collection Frequency</b><br><sub>a</sub> | <b>Reports to Prescribers</b><br><sub>e</sub> | <b>Reports to Dispensers</b><br><sub>f</sub> |
|---------------------|----------------------------------------------------|-----------------------------------------|------------------------------------|---------------------------------------------|-------------------------------------------|-------------------------------------------|-------------------------------------------|--------------------------------------------------|-----------------------------------------------|----------------------------------------------|
| <b>Wyoming</b>      | 2004                                               | 573,720                                 | Pharmacy Board                     | Prescribers & Dispensers                    | Not Required                              | None                                      | Schedules II-V                            | Daily                                            | Solicited & Unsolicited                       | Solicited & Unsolicited                      |

<sup>a</sup> PDMP TTAC. State Profiles. <http://www.pdmpassist.org/content/state-profiles>.

<sup>b</sup> PDMP TTAC. Engaged in Sending Solicited and Unsolicited Reports to Prescribers. <http://www.pdmpassist.org/content/pdmp-maps-and-tables>. Published 2018.

<sup>c</sup> PDMP TTAC. PDMP Mandatory Query by Prescribers and Dispensers. <http://www.pdmpassist.org/content/pdmp-maps-and-tables>. Published 2016.

<sup>d</sup> PDMP TTAC. PDMP Mandatory Training of Prescribers and Dispensers. <http://www.pdmpassist.org/content/pdmp-maps-and-tables>. Published 2018.

<sup>e</sup> PDMP TTAC. PDMP Mandatory Enrollment of Prescribers and Dispensers. <http://www.pdmpassist.org/content/pdmp-maps-and-tables>. Published 2019.

<sup>f</sup> PDMP TTAC. Engaged in Sending Solicited and Unsolicited Reports to Dispensers. <http://www.pdmpassist.org/content/pdmp-maps-and-tables>. Published 2018.

**Appendix D.** Detailed risk of bias and quality assessments for included studies ((a) – AXIS, (b) – CASP).

**(a) AXIS**

| Study ID                    | AXIS Item |     |     |     |     |     |     |     |     |     |     |     |     |     |     |     |     |     |     |     |     |     |
|-----------------------------|-----------|-----|-----|-----|-----|-----|-----|-----|-----|-----|-----|-----|-----|-----|-----|-----|-----|-----|-----|-----|-----|-----|
|                             | 1         | 2   | 3   | 4   | 5   | 6   | 7   | 8   | 9   | 10  | 11  | 12  | 13  | 14  | 15  | 16  | 17  | 18  | 19  | 20  |     |     |
| <b>Barrett 2005</b>         | yes       | yes | no  | yes | yes | yes | no  | yes | yes | yes | yes | no  | yes | no  | no  | yes | no  | yes | no  | yes |     |     |
| <b>Blum 2016</b>            | yes       | yes | no  | yes | yes | no  | no  | yes | yes | yes | yes | yes | yes | no  | yes | yes | yes | yes | yes | no  | yes |     |
| <b>Chaudhary 2017</b>       | yes       | yes | no  | yes | no  | no  | no  | yes | yes | yes | yes | no  | yes | no  | yes | yes | yes | yes | yes | no  | yes |     |
| <b>Coleman 2015</b>         | yes       | yes | no  | yes | no  | no  | no  | yes | yes | yes | no  | no  | yes | no  | yes | yes | yes | yes | yes | no  | yes |     |
| <b>Delcher 2017</b>         | yes       | yes | no  | yes | yes | yes | NA  | yes | yes | yes | yes | yes | NA  | NA  | yes | yes | yes | yes | yes | no  | yes |     |
| <b>Deyo 2015</b>            | yes       | yes | no  | yes | yes | yes | no  | yes | yes | no  | yes | no  | yes | no  | yes |     |
| <b>Deyo 2018</b>            | yes       | yes | no  | yes | yes | yes | NA  | yes | yes | yes | yes | yes | NA  | NA  | yes | yes | yes | yes | yes | no  | yes |     |
| <b>Fazio 2017</b>           | yes       | yes | no  | yes | yes | no  | no  | yes | yes | NA  | yes | yes | yes | no  | yes | yes | yes | yes | yes | no  | yes |     |
| <b>Feldman 2011</b>         | yes       | yes | no  | yes | yes | no  | no  | yes | yes | yes | yes | yes | yes | no  | yes | yes | yes | yes | yes | no  | yes |     |
| <b>Feldman 2012</b>         | yes       | yes | yes | yes | no  | no  | no  | yes | yes | yes | yes | yes | no  | no  | yes | yes | yes | yes | yes | no  | yes |     |
| <b>Fendrich 2018</b>        | yes       | yes | no  | yes | yes | no  | no  | yes | yes | yes | no  | yes | yes | no  | yes | no  | yes | yes | yes | no  | yes |     |
| <b>Finnell 2017</b>         | no        | yes | no  | yes | no  | no  | no  | yes | yes | yes | yes | no  | yes | no  | no  | yes | yes | yes | yes | no  | no  |     |
| <b>Fleming 2013</b>         | yes       | yes | yes | yes | yes | yes | no  | no  | yes | NA  | no  | no  | yes | no  | yes | yes | no  | yes | no  | yes | yes |     |
| <b>Fleming 2014a</b>        | yes       | yes | no  | yes | yes | no  | no  | yes | yes | yes | yes | yes | yes | no  | yes | yes | yes | yes | yes | no  | yes |     |
| <b>Fleming 2014b</b>        | yes       | yes | no  | yes | yes | yes | no  | yes | yes | yes | yes | yes | yes | no  | yes | yes | yes | yes | yes | no  | yes |     |
| <b>Gershman 2014</b>        | yes       | yes | no  | yes | yes | yes | no  | yes | no  | NA  | no  | no  | yes | no  | yes | no  | yes | yes | yes | no  | yes |     |
| <b>Green 2012</b>           | yes       | yes | no  | yes | yes | yes | yes | yes | yes | no  | yes | yes | yes | yes | no  | yes | yes | yes | yes | yes | no  | yes |
| <b>Green 2013</b>           | yes       | yes | no  | yes | no  | yes | yes | yes | yes | yes | yes | no  | yes |
| <b>Hernandez-Meier 2017</b> | yes       | yes | no  | yes | yes | no  | no  | yes | no  | NA  | yes | yes | yes | no  | yes | yes | yes | yes | yes | yes | no  | yes |
| <b>Irvine 2014</b>          | yes       | yes | no  | yes | yes | yes | no  | yes | yes | yes | yes | yes | yes | no  | yes | no  | yes | yes | yes | no  | yes |     |
| <b>Kelley 2013</b>          | yes       | yes | yes | yes | no  | no  | no  | yes | yes | yes | yes | no  | yes | no  | no  | yes | yes | yes | yes | no  | yes |     |
| <b>LeMire 2012</b>          | yes       | yes | no  | yes | no  | no  | no  | yes | no  | no  | no  | no  | no  | no  | yes | yes | no  | no  | no  | no  | yes |     |
| <b>Lin 2017</b>             | yes       | yes | no  | yes | yes | yes | no  | yes | yes | yes | yes | no  | yes | no  | no  | yes | yes | yes | yes | no  | yes |     |
| <b>Matusow 2018</b>         | yes       | yes | no  | yes | no  | no  | yes | yes | no  | no  | no  | yes | no  | yes | no  | yes | yes | yes | yes | no  | yes |     |
| <b>McAllister 2015</b>      | yes       | yes | no  | no  | yes | no  | yes | no  | no  | yes | no  | yes | no  | yes | no  | yes |
| <b>McCauley 2016</b>        | yes       | yes | no  | yes | yes | yes | no  | yes | yes | yes | no  | no  | yes | no  | no  | yes | yes | yes | yes | no  | yes |     |

| Study ID                | AXIS Item |     |     |     |     |     |     |     |     |     |     |     |     |     |     |     |     |     |    |     |
|-------------------------|-----------|-----|-----|-----|-----|-----|-----|-----|-----|-----|-----|-----|-----|-----|-----|-----|-----|-----|----|-----|
|                         | 1         | 2   | 3   | 4   | 5   | 6   | 7   | 8   | 9   | 10  | 11  | 12  | 13  | 14  | 15  | 16  | 17  | 18  | 19 | 20  |
| <b>Norwood 2016</b>     | yes       | no  | no  | yes | no  | yes | yes | yes | no | yes |
| <b>Penm 2018</b>        | yes       | no  | no  | yes | yes | yes | no  | yes | yes | yes | yes | no  | no  | no  | no  | yes | yes | yes | no | yes |
| <b>Perrone 2012</b>     | yes       | yes | no  | yes | yes | yes | no  | yes | yes | no  | no  | no  | yes | no  | no  | yes | yes | yes | no | yes |
| <b>Piper 2016</b>       | yes       | yes | no  | yes | yes | yes | no  | yes | no  | no  | no  | no  | yes | yes | yes | yes | yes | yes | no | yes |
| <b>Pomerleau 2017</b>   | yes       | yes | no  | yes | yes | yes | no  | yes | no  | no  | yes | no  | no  | no  | no  | yes | yes | yes | no | yes |
| <b>Pugliese 2018</b>    | yes       | yes | yes | yes | yes | yes | yes | yes | yes | yes | yes | yes | yes | yes | yes | yes | yes | yes | no | yes |
| <b>Qureshi 2015</b>     | yes       | yes | no  | yes | yes | yes | no  | yes | yes | NA  | no  | yes | yes | no  | yes | no  | yes | yes | no | no  |
| <b>Riley 2017</b>       | yes       | yes | yes | yes | yes | yes | no  | no  | no  | NA  | no  | yes | yes | no  | yes | yes | yes | yes | no | yes |
| <b>Ringwalt 2015</b>    | yes       | yes | yes | yes | yes | yes | NA  | yes | yes | NA  | yes | yes | NA  | NA  | yes | yes | yes | yes | no | yes |
| <b>Rittenhouse 2015</b> | yes       | yes | yes | yes | yes | yes | no  | yes | no  | yes | yes | yes | yes | no  | yes | yes | yes | yes | no | yes |
| <b>Rutkow 2015</b>      | no        | yes | no  | yes | yes | no  | yes | yes | no  | yes | yes | yes | yes | no  | yes | yes | yes | yes | no | yes |
| <b>Sun 2018</b>         | yes       | yes | yes | yes | yes | yes | NA  | yes | yes | yes | yes | yes | NA  | NA  | yes | yes | yes | yes | no | yes |
| <b>Ulbrich 2010</b>     | yes       | yes | no  | yes | yes | no  | no  | yes | yes | yes | yes | yes | yes | no  | yes | yes | yes | yes | no | yes |
| <b>Wallace 2017</b>     | yes       | yes | no  | yes | yes | yes | NA  | yes | no  | yes | yes | yes | NA  | NA  | yes | yes | yes | yes | no | yes |
| <b>Wang 2017</b>        | yes       | yes | no  | yes | yes | no  | no  | yes | yes | yes | yes | yes | yes | no  | yes | yes | yes | no  | no | yes |
| <b>Warren 2016</b>      | no        | no  | no  | yes | yes | yes | no  | yes | no  | NA  | no  | yes | NA  | NA  | yes | no  | no  | yes | no | yes |
| <b>Wixson 2015</b>      | yes       | yes | no  | yes | yes | yes | no  | yes | yes | yes | yes | yes | yes | no  | yes | yes | yes | yes | no | yes |
| <b>Young 2017</b>       | yes       | yes | no  | yes | no  | no  | no  | yes | no  | NA  | no  | yes | yes | no  | yes | no  | yes | yes | no | yes |

**(b) CASP**

| <b>Study ID</b>       | <b>CASP Item</b>                                                |                                                  |                                                                                 |                                                                              |                                                                           |                                                                                               |                                                           |                                                     |                                                |                                      |
|-----------------------|-----------------------------------------------------------------|--------------------------------------------------|---------------------------------------------------------------------------------|------------------------------------------------------------------------------|---------------------------------------------------------------------------|-----------------------------------------------------------------------------------------------|-----------------------------------------------------------|-----------------------------------------------------|------------------------------------------------|--------------------------------------|
|                       | <b>Was there a clear statement of the aims of the research?</b> | <b>Is a qualitative methodology appropriate?</b> | <b>Was the research design appropriate to address the aims of the research?</b> | <b>Was the recruitment strategy appropriate to the aims of the research?</b> | <b>Was the data collected in a way that addressed the research issue?</b> | <b>Has the relationship between researcher &amp; participants been adequately considered?</b> | <b>Have ethical issues been taken into consideration?</b> | <b>Was the data analysis sufficiently rigorous?</b> | <b>Is there a clear statement of findings?</b> | <b>How valuable is the research?</b> |
| <b>Carnes 2017</b>    | yes                                                             | yes                                              | yes                                                                             | yes                                                                          | yes                                                                       | yes                                                                                           | yes                                                       | yes                                                 | yes                                            | Demonstrates its value               |
| <b>Click 2017</b>     | yes                                                             | yes                                              | yes                                                                             | no                                                                           | yes                                                                       | no                                                                                            | yes                                                       | yes                                                 | yes                                            | Demonstrates its value               |
| <b>Deyo 2015</b>      | yes                                                             | yes                                              | yes                                                                             | yes                                                                          | yes                                                                       | yes                                                                                           | yes                                                       | yes                                                 | yes                                            | Demonstrates its value               |
| <b>Fazio 2017</b>     | yes                                                             | yes                                              | yes                                                                             | no                                                                           | yes                                                                       | yes                                                                                           | yes                                                       | yes                                                 | yes                                            | Demonstrates its value               |
| <b>Hildebran 2014</b> | yes                                                             | yes                                              | yes                                                                             | yes                                                                          | yes                                                                       | no                                                                                            | yes                                                       | yes                                                 | yes                                            | Demonstrates its value               |
| <b>Homant 2006</b>    | yes                                                             | yes                                              | yes                                                                             | no                                                                           | yes                                                                       | yes                                                                                           | yes                                                       | no                                                  | yes                                            | Demonstrates its value               |
| <b>Naiman 2013</b>    | yes                                                             | yes                                              | yes                                                                             | yes                                                                          | yes                                                                       | no                                                                                            | yes                                                       | no                                                  | yes                                            | Demonstrates its value               |
| <b>Perrone 2012</b>   | yes                                                             | yes                                              | no                                                                              | yes                                                                          | yes                                                                       | no                                                                                            | yes                                                       | no                                                  | yes                                            | Value not demonstrated               |
| <b>Poon 2016</b>      | yes                                                             | yes                                              | yes                                                                             | yes                                                                          | yes                                                                       | no                                                                                            | no                                                        | no                                                  | yes                                            | Demonstrates its value               |
| <b>Radomski 2018</b>  | yes                                                             | yes                                              | yes                                                                             | yes                                                                          | yes                                                                       | no                                                                                            | yes                                                       | yes                                                 | yes                                            | Demonstrates its value               |
| <b>Smith 2015</b>     | yes                                                             | yes                                              | yes                                                                             | no                                                                           | yes                                                                       | no                                                                                            | no                                                        | yes                                                 | yes                                            | Demonstrates its value               |
| <b>Warren 2016</b>    | yes                                                             | yes                                              | yes                                                                             | yes                                                                          | yes                                                                       | yes                                                                                           | yes                                                       | yes                                                 | yes                                            | Demonstrates its value               |



| Study ID    | CASP Item                                                |                                           |                                                                          |                                                                       |                                                                    |                                                                                    |                                                    |                                              |                                         |                               |
|-------------|----------------------------------------------------------|-------------------------------------------|--------------------------------------------------------------------------|-----------------------------------------------------------------------|--------------------------------------------------------------------|------------------------------------------------------------------------------------|----------------------------------------------------|----------------------------------------------|-----------------------------------------|-------------------------------|
|             | Was there a clear statement of the aims of the research? | Is a qualitative methodology appropriate? | Was the research design appropriate to address the aims of the research? | Was the recruitment strategy appropriate to the aims of the research? | Was the data collected in a way that addressed the research issue? | Has the relationship between researcher & participants been adequately considered? | Have ethical issues been taken into consideration? | Was the data analysis sufficiently rigorous? | Is there a clear statement of findings? | How valuable is the research? |
| Worley 2015 | yes                                                      | yes                                       | yes                                                                      | yes                                                                   | yes                                                                | yes                                                                                | yes                                                | yes                                          | yes                                     | Value not demonstrated        |

**Appendix E.** Results of pooled proportion meta-analysis of ever PMP data use by year.

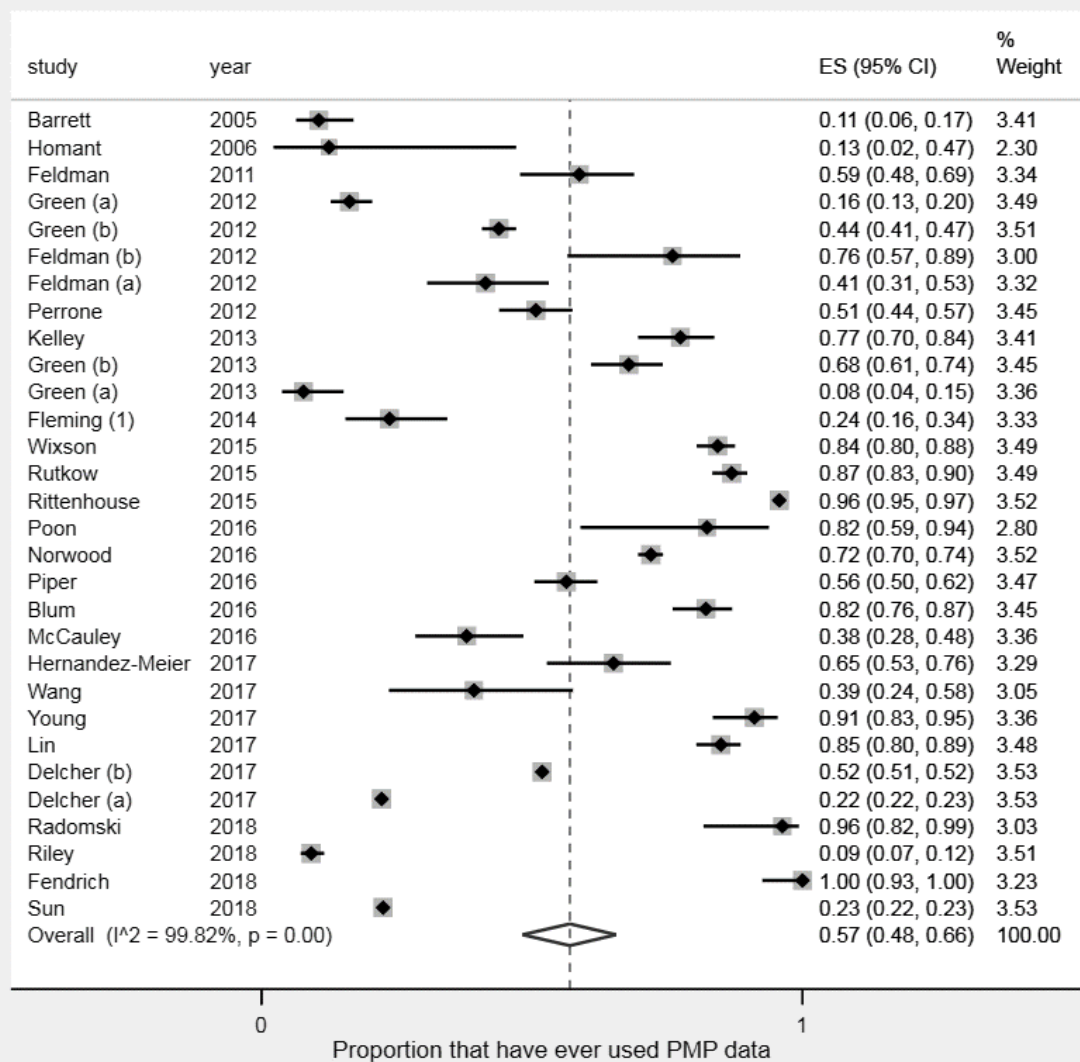

Supplement: pnaa412_supplementary_data.pdf [file pnaa412_supplementary_data.pdf]
